# Supplementary material for: Dysregulation of mCD46 and sCD46 contribute to the pathogenesis of bullous pemphigoid
Source: PubMed Central journal article supplement (PMC5428046; doi:10.1038/s41598-017-00235-3), 2017-03-10

## Supplementary information

### **Dysregulation of mCD46 and sCD46 contribute to the pathogenesis of bullous pemphigoid**

Pei Qiao<sup>1,2</sup>, Erle Dang<sup>1,2</sup>, Tianyu Cao<sup>1</sup>, Hui Fang<sup>1</sup>, Jieyu Zhang<sup>1</sup>, Hongjiang Qiao<sup>1</sup>  
and Gang Wang<sup>1</sup>. \*

<sup>1</sup> Department of Dermatology, Xijing Hospital, Fourth Military Medical University,  
Xi'an, China

<sup>2</sup> These authors equally contributed to this paper

\*Corresponding author: Department of Dermatology, Xijing Hospital, Fourth Military  
Medical University, Xi'an, Shaanxi Province, China. Tel. & fax: +86-29-84775401.

E-mail address: [xjwgang@fmmu.edu.cn](mailto:xjwgang@fmmu.edu.cn) (Gang Wang)

## Supplementary Table

**Table S1. Demographic Characteristics of BP Patients**

| Bullous Pemphigoid Number | Sex    | Age | Anti-BP18 0-NC16A (U/ml) | Bullous Pemphigoid Number | Sex    | Age | Anti-BP18 0-NC16A (U/ml) |
|---------------------------|--------|-----|--------------------------|---------------------------|--------|-----|--------------------------|
| B114                      | Female | 40  | 9                        | B378                      | Female | 51  | 18                       |
| B128                      | Female | 54  | 106                      | B379                      | Male   | 62  | 110                      |
| B141                      | Male   | 67  | -                        | B382                      | Male   | 79  | 162                      |
| B144                      | Female | 70  | 37                       | B383                      | Female | 46  | 188                      |
| B158                      | Female | 40  | 5                        | B384                      | Female | 65  | 189                      |
| B163                      | Female | 41  | 12                       | B385                      | Male   | 79  | 18                       |
| B165                      | Female | 63  | 139                      | B386                      | Female | 66  | 17                       |
| B172                      | Male   | 49  | 11                       | B387                      | Male   | 66  | 9                        |
| B208                      | Female | 55  | 30                       | B392                      | Male   | 63  | 59                       |
| B216                      | Female | 63  | 90                       | B391                      | Male   | 75  | 17                       |
| B219                      | Male   | 79  | 27                       | B393                      | Female | 50  | 35                       |
| B221                      | Male   | 78  | 12                       | B395                      | Female | 80  | 153                      |
| B369                      | Male   | 63  | -                        | B401                      | Female | 66  | 23                       |
| B371                      | Male   | 77  | 30                       | B402                      | Female | 56  | 112                      |
| B373                      | Female | 65  | 12                       | B403                      | Male   | 78  | -                        |
| B374                      | Female | 58  | 5                        | B410                      | Female | 64  | 145                      |
| B375                      | Male   | 59  | 24                       | B411                      | Female | 68  | 37                       |
| B376                      | Male   | 60  | 2                        | B443                      | Female | 48  | 4                        |

## Supplementary Figure

### Supplementary Fig. S1. sCD46 level in the paired serum and blister fluid from 3

**BP patients.** ELISA assay was used to determine the sCD46 level in serums and blister fluids from 3 BP patients and 3 healthy controls.

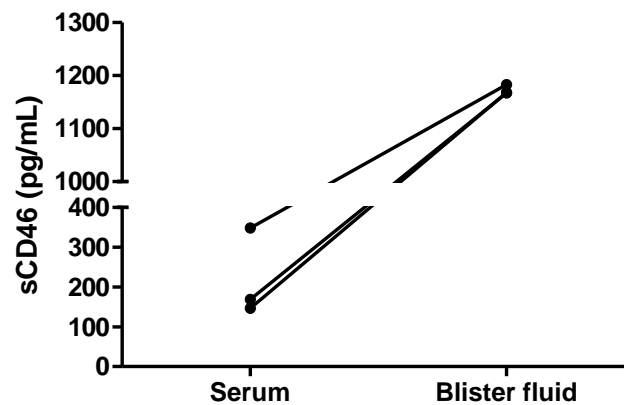

### Supplementary Fig. S2. Small interference RNA targeting CD46 was transfected

**into Keratinocytes to detect the expression of CD46 protein. (A)** Basal expression

of CD46 in HaCaT human keratinocytes determined by immunofluorescence and **(B)**

western blot. **(C)** The effectiveness of anti-CD46 siRNA relative to that of the

negative control was determined by western blot after 48 h of transfection. **(D)**

Effectiveness of the transfection system.

A

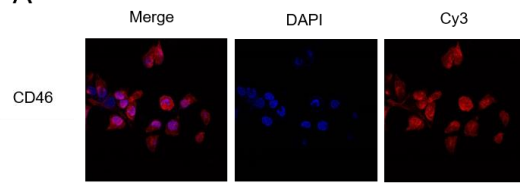

B

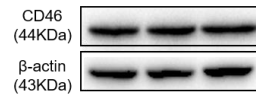

C

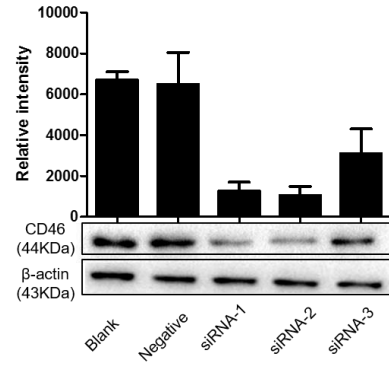

D

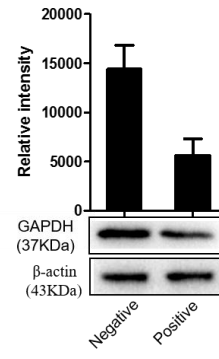

Supplement: 41598_2017_235_MOESM1_ESM.pdf [file 41598_2017_235_MOESM1_ESM.pdf]
